# Supplementary material for: Evaluation of nurses’ changing perceptions when trained to implement a self-management programme for dual sensory impaired older adults in long-term care: a qualitative study
Source: PubMed Central journal article supplement — BMJ Open. 2016 Nov 17;6(11):e013122. doi: 10.1136/bmjopen-2016-013122 (PMC5129041; doi:10.1136/bmjopen-2016-013122), 2016-11-17
Supplement: bmjopen-2016-013122supp_appendix.pdf [file bmjopen-2016-013122supp_appendix.pdf]

## Appendix 1. Content of the SMP-DSI Training Manual\*

### Round 1

#### *Session 1 Group training*

- Activity 1* Introduction - \*Identification of problems and needs related to DSI
- Activity 2* Training overview and responsibilities
- Activity 3* Identification of self-management in personal life
- Activity 4* Introduction of the 5 steps structure of the SMP-DSI
- Activity 5* \*Experiencing/simulating being dual sensory impaired
- Activity 6* \*Exercising how to adjust to the communicative needs of DSI older adults
- Activity 7* Exercising step 1 Problem Identification and step 2 Alternatives
- Activity 8* Home assignments (*communication adjustment*; SMP-DSI)
- Activity 9* Identifying personal learning goals

#### *Session 2 Individual coaching*

- Activity 1* Feedback- training overview and responsibilities
- Activity 2* Feedback -home assignments (*communication adjustment*; SMP-DSI)
- Activity 3* Identifying personal learning goals

#### *Session 3 Group supervision*

- Activity 1* Exchange of experiences
- Activity 2* Identifying personal learning goals

### Round 2

#### *Session 4 Group training*

- Activity 1* Feedback/ SMP-DSI
- Activity 2* Practicing step 3, support in making an action plan
- Activity 3* SMP-DSI in complex situations
- Activity 4* \*Practicing how to open up information for DSI older clients
- Activity 5* Practicing step 3 Plan and step 5 Evaluation
- Activity 6* Home assignments (SMP-DSI)
- Activity 7* Identifying personal learning goals

#### *Session 5 Individual coaching*

- Activity 1* Feedback - home assignments
- Activity 2* Identifying personal learning goals

#### *Session 6 Group supervision*

- Activity 1* Exchange of experiences
- Activity 2* Identifying personal learning goals

### Round 3

*Session 7 Group training*

|                   |                                                      |
|-------------------|------------------------------------------------------|
| <i>Activity 1</i> | Feedback/SMP-DSI steps/shared decision making        |
| <i>Activity 2</i> | Self-management- key issues                          |
| <i>Activity 3</i> | Traps when using SMP-DSI                             |
| <i>Activity 4</i> | *Experiencing ADL and IADL needs of DSI older adults |
| <i>Activity 5</i> | *Environmental alterations to meet DSI-needs         |
| <i>Activity 6</i> | Practicing the SMP-DSI in challenging situations     |
| <i>Activity 7</i> | Identifying personal learning goals                  |

*Session 8 Individual coaching*

|                   |                                     |
|-------------------|-------------------------------------|
| <i>Activity 1</i> | Feedback - home assignment          |
| <i>Activity 2</i> | Identifying personal learning goals |

*Session 9 Group supervision*

|                   |                         |
|-------------------|-------------------------|
| <i>Activity 1</i> | Exchange of experiences |
| <i>Activity 2</i> | Closing                 |

*\*Specific dual sensory impaired related training*

*Home assignments*

1. Communication adjustment

Ask the older person to describe what/how he sees the environment, what/how he hears the environment.

Ask the older adult to give you feedback on your speech (check distance, lighting, etc).

Make a list of communication tips and ask the older adult if they are correct.

2. SMP-DSI

Did the older adult express a wish or problem? Start with step 1 of the SMP-DSI.

Was it not possible to observe a wish or problem? Ask the older adult if there is anything he wants to change, he longs for. Start with step 1 of the SMP-DSI.
